# Supplementary material for: Sargachromenol Purified from Sargassum horneri Inhibits Inflammatory Responses via Activation of Nrf2/HO-1 Signaling in LPS-Stimulated Macrophages
Source: MDPI journal article supplement (doi:10.3390/md19090497), 2021-08-31
Supplement: s1 [file s1]

Supplementary data

## **Sargachromenol purified from *Sargassum horneri* inhibits inflammatory responses via activation of Nrf2/HO-1 signaling in LPS-stimulated macrophages**

**Eui Jeong Han<sup>1,2</sup>, Thilina.U. Jayawardena<sup>3</sup>, Jae-Hyuk Jang<sup>4</sup>, Ilekuttige Priyan Shanura Fernando<sup>5</sup>, Youngheun Jee<sup>6,7</sup>, You-Jin Jeon<sup>3</sup>, Dae-Sung Lee<sup>8</sup>, Jeong Min Lee<sup>8</sup>, Mi-Jin Yim<sup>8</sup>, Lei Wang<sup>9</sup>, Hyun-Soo Kim<sup>8,\*</sup>, Ginnae Ahn<sup>2,5\*</sup>**

<sup>1</sup> Research Center for Healthcare and Biomedical Engineering, Chonnam National University, Yeosu 59626, Korea; [iosu5772@naver.com](mailto:iosu5772@naver.com) (E.J.H)

<sup>2</sup> Department of Food Technology and Nutrition, Chonnam National University, Yeosu 59626, Republic of Korea; [iosu5772@naver.com](mailto:iosu5772@naver.com) (E.J.H)

<sup>3</sup> Department of Marine Life Science, Jeju National University, Jeju 63243, Republic of Korea; [tuduwaka@jejunu.ac.kr](mailto:tuduwaka@jejunu.ac.kr) (T.U.J); [youjinj@jejunu.ac.kr](mailto:youjinj@jejunu.ac.kr) (Y.-J)

<sup>4</sup> Natural Medicine Research Center Korea Research Institute of Bioscience and Biotechnology, Chungcheongbuk-do 28116, Republic of Korea; [jangjh@kribb.re.kr](mailto:jangjh@kribb.re.kr) (J.-H.J)

<sup>5</sup> Department of Marine Bio-Food Sciences, Chonnam National University, Yeosu 59626, Republic of Korea; [shanurabru@jnu.ac.kr](mailto:shanurabru@jnu.ac.kr) (I.P.S.F)

<sup>6</sup> Department of Veterinary Medicine and Veterinary Medical Research Institute, Jeju National University, Jeju 63243, Republic of Korea; [yhjee@jejunu.ac.kr](mailto:yhjee@jejunu.ac.kr) (Y.J)

<sup>7</sup> Interdisciplinary Graduate Program in Advanced Convergence Technology & Science, Jeju National University, Jeju 63243, Republic of Korea; [yhjee@jejunu.ac.kr](mailto:yhjee@jejunu.ac.kr) (Y.J)

<sup>8</sup> National Marine Biodiversity Institute of Korea, 75, Jangsan-ro 101 gil, Janghang-eup, Seochon 33662, Republic of Korea; [daesung@mabik.re.kr](mailto:daesung@mabik.re.kr) (D.-S.L); [lshjm@mabik.re.kr](mailto:lshjm@mabik.re.kr) (J.M.L); [mjyim@mabik.re.kr](mailto:mjyim@mabik.re.kr) (M.-J.Y); [gustn783@mabik.re.kr](mailto:gustn783@mabik.re.kr) (H.-S.K)

<sup>9</sup> College of Food Science and Engineering, Ocean University of China, Qingdao 266003, China; [leiwang2021@ouc.edu.cn](mailto:leiwang2021@ouc.edu.cn) (L.W))

\* Correspondence: [gnahn@jnu.ac.kr](mailto:gnahn@jnu.ac.kr) (G.A); [gustn783@mabik.re.kr](mailto:gustn783@mabik.re.kr) (H.-S.K.); Tel: +82-61-659-7213 (G.A); +82-041-950-0919 (H.-S. K.)

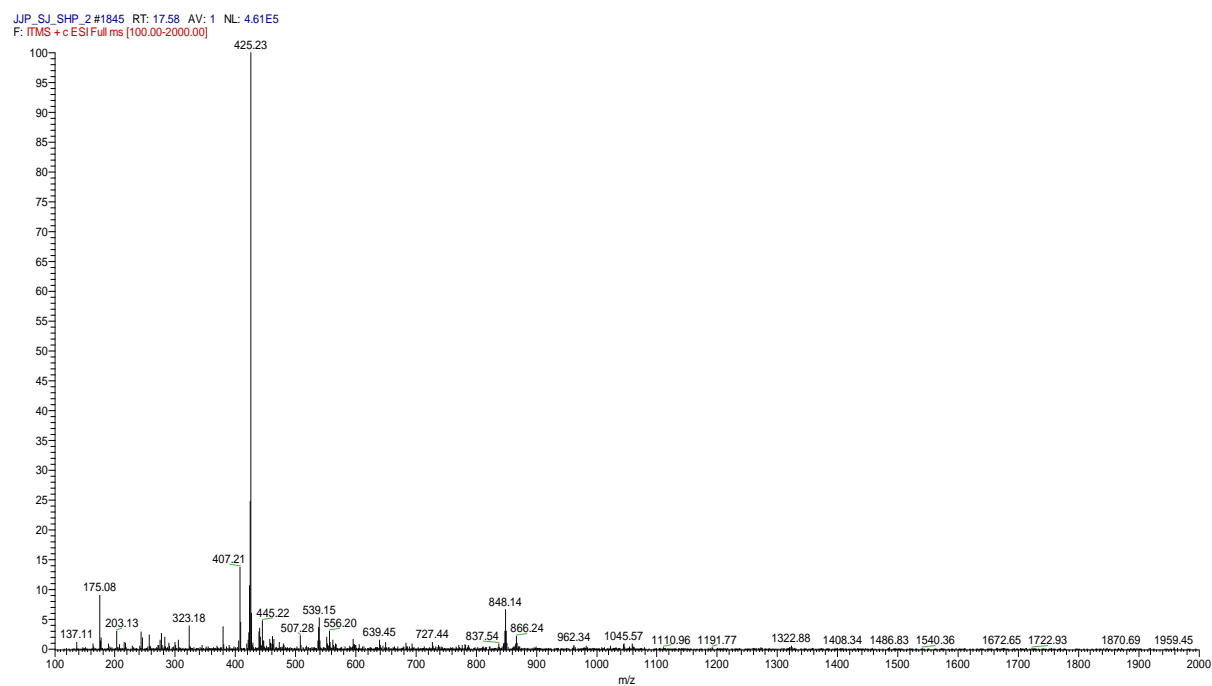

**Supplemental figure S1.** ESI-MS spectra (positive ion mode) of Sargachromenol.

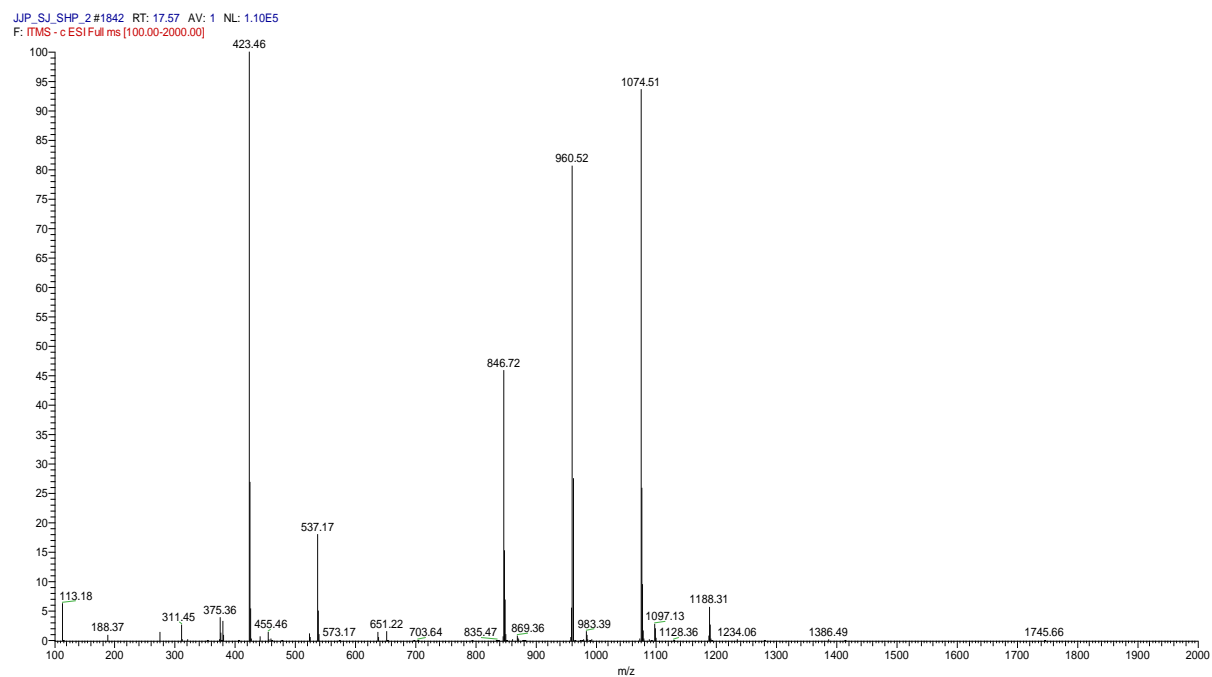

**Supplemental figure S2.** ESI-MS spectra (negative ion mode) of Sargachromenol
